# Supplementary material for: Estimated Dietary Intake of Trace Metals from Swordfish Consumption: A Human Health Problem
Source: PubMed Central journal article supplement (PMC6027446; doi:10.3390/toxics6020022), 2018-04-03
Supplement: toxics-06-00022-s001.pdf [file toxics-06-00022-s001.pdf]

# Supplementary Materials: Estimated Dietary Intake of Trace Metals from Swordfish Consumption: A Human Health Problem

Grazia Barone, Angela Dambrosio, Arianna Storelli, Rita Garofalo, Vito Pietro Busco and Maria Maddalena Storelli

**Table S1.** Lamp parameters for analysis of each element in terms of atomic absorption (Shimadzu AA 7000).

| <b>Cd</b>                                |                                    |
|------------------------------------------|------------------------------------|
| BGC Mode                                 | BGC-D2                             |
| Wavelength                               | 228.8 nm                           |
| Lamp current                             | 6 mA                               |
| Slit width                               | 0.7 nm                             |
| <b>Cr</b>                                |                                    |
| BGC Mode                                 | BGC-D2                             |
| Wavelength                               | 357.9 nm                           |
| Lamp current                             | 10 mA                              |
| Slit width                               | 0.7 nm                             |
| <b>Cu</b>                                |                                    |
| BGC Mode                                 | BGC-D2                             |
| Wavelength                               | 324.8 nm                           |
| Lamp current                             | 8 mA                               |
| Slit width                               | 0.7 nm                             |
| <b>Hg</b>                                |                                    |
| BGC Mode                                 | BGC-D2                             |
| Wavelength                               | 253.7 nm                           |
| Lamp current                             | 4 mA                               |
| Slit width                               | 0.7 nm                             |
| No flame                                 | HVG analysis                       |
| Burner height                            | 16 mm                              |
| <b>Ni</b>                                |                                    |
| BGC Mode                                 | BGC-D2                             |
| Wavelength                               | 332.0 nm                           |
| Lamp current                             | 12 mA                              |
| Slit width                               | 0.2 nm                             |
| <b>Pb</b>                                |                                    |
| BGC Mode                                 | BGC-D2                             |
| Wavelength                               | 283.3 nm                           |
| Lamp current                             | 10 mA                              |
| Slit width                               | 0.7 nm                             |
| <b>Zn</b>                                |                                    |
| BGC Mode                                 | BGC-D2                             |
| Wavelength                               | 213.9 nm                           |
| Lamp current                             | 8 mA                               |
| Slit width                               | 0.7 nm                             |
| Flame type                               | Air-CH <sub>2</sub> H <sub>2</sub> |
| CH <sub>2</sub> H <sub>2</sub> flow rate | 2.0 L/min                          |
| Burner height                            | 7 mm                               |
